# Supplementary material for: The Spatial Association of Gene Expression Evolves from Synchrony to Asynchrony and Stochasticity with Age
Source: PubMed Central journal article supplement (PMC3166296; doi:10.1371/journal.pone.0024076), 2011-09-02
Supplement: pone.0024076.s007.pdf [file pone.0024076.s007.pdf]

A

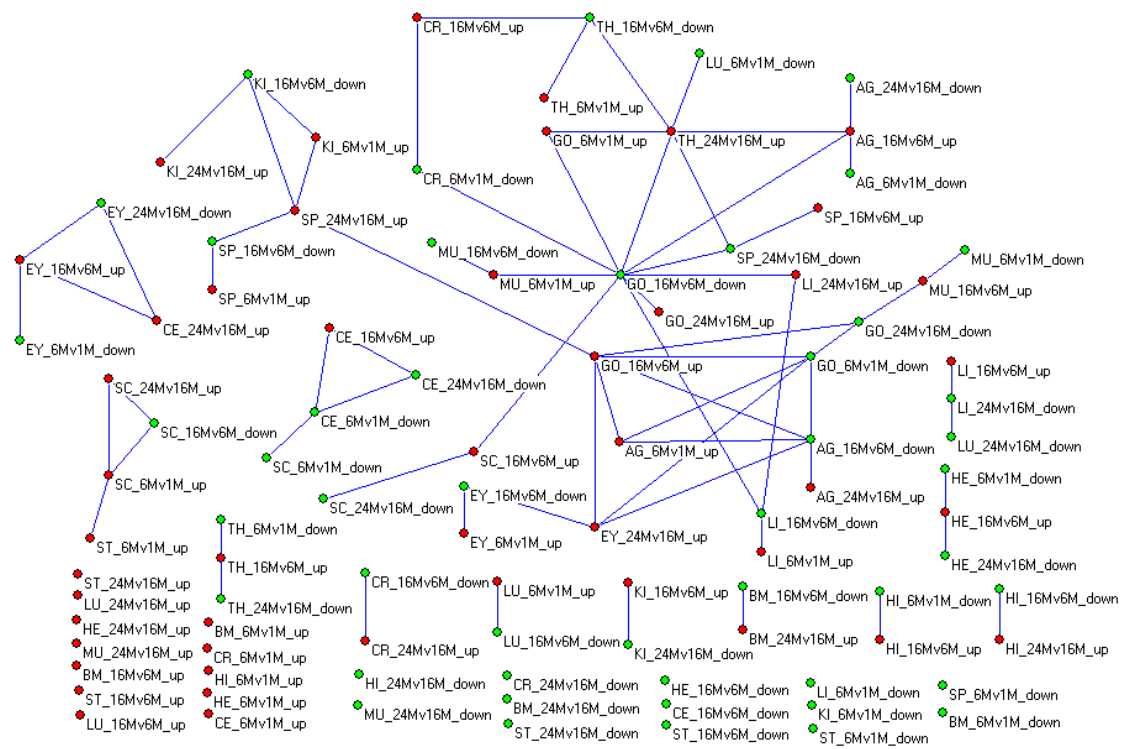

B

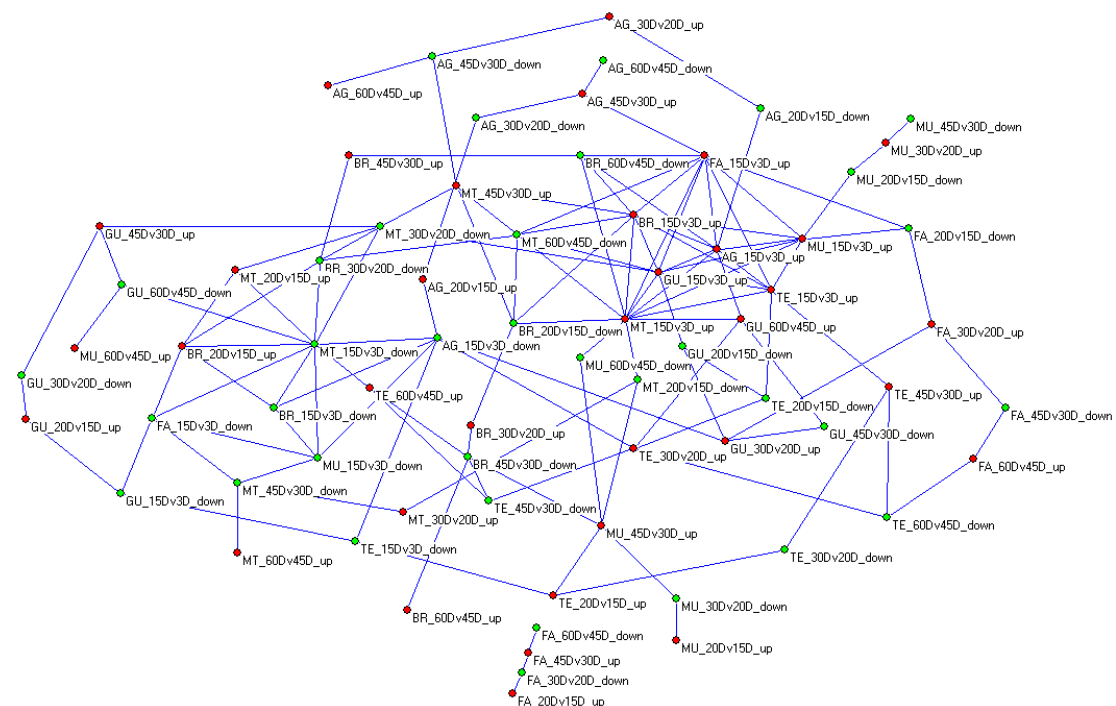

Figure S1 illustrates overall network of genes association through different time and space in age process of (A) male Mice ( $p < 0.0005$ ) and (B) *Drosophila melanogaster* ( $p < 0.0005$ ), showing whether the age-related genes occurring in particular age phase of some tissue at number significantly also occur in another phase of the same or different tissue.
